# Supplementary material
Source: PubMed Central journal article supplement (PMC10064801)

A

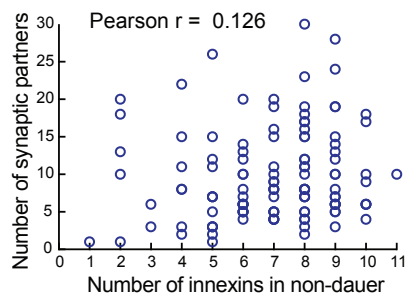

B

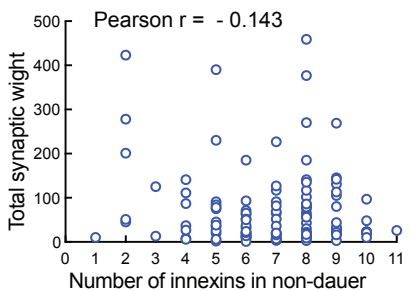

C

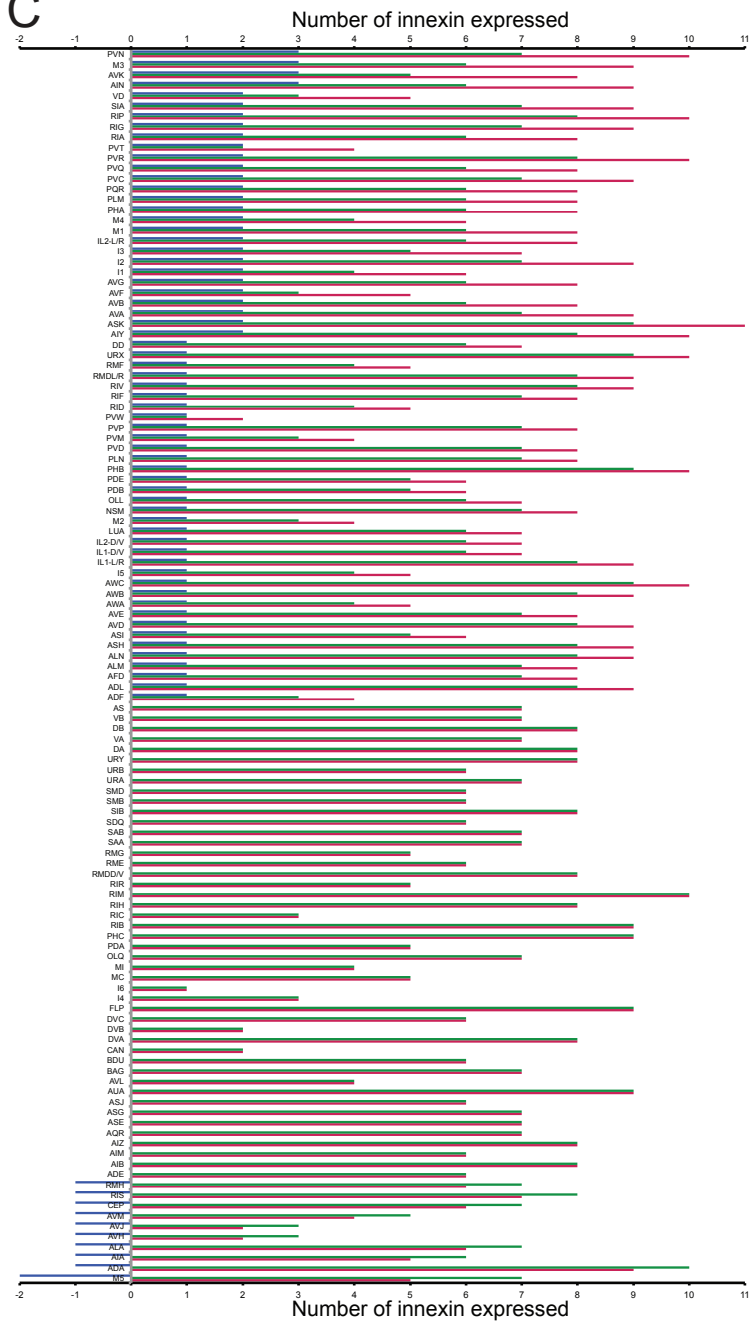

Figure S1

Supplement: NIHMS1519292-supplement-1.pdf [file NIHMS1519292-supplement-1.pdf]

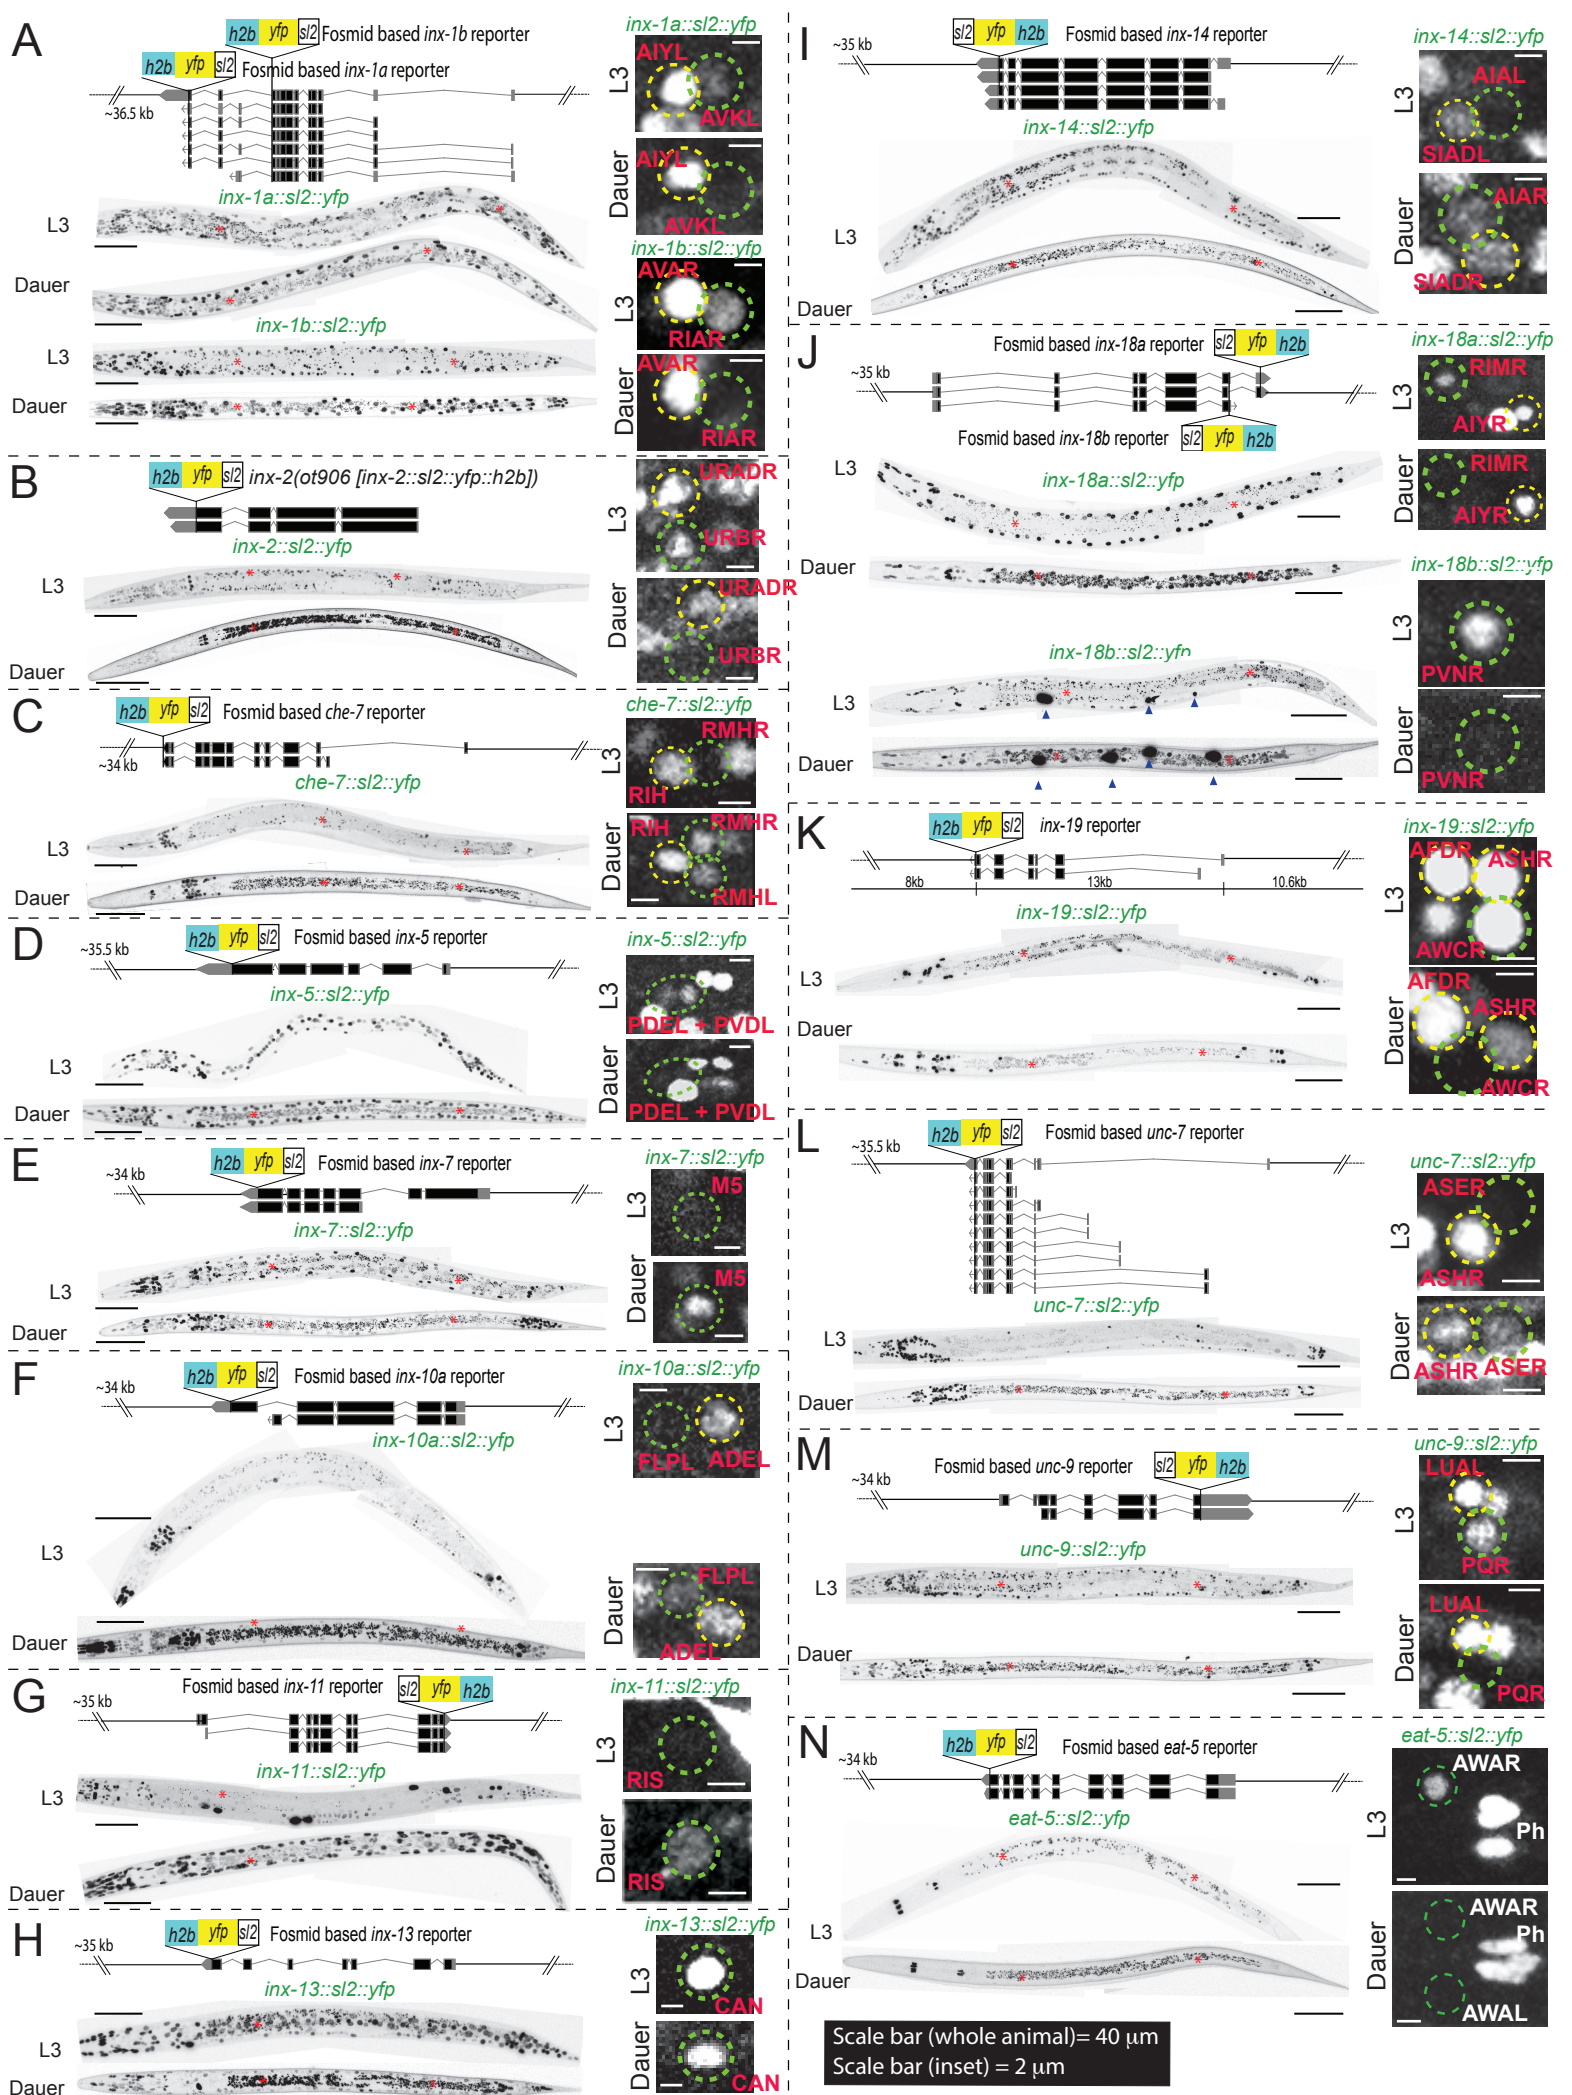

Figure S2

Supplement: NIHMS1519292-supplement-2.pdf [file NIHMS1519292-supplement-2.pdf]

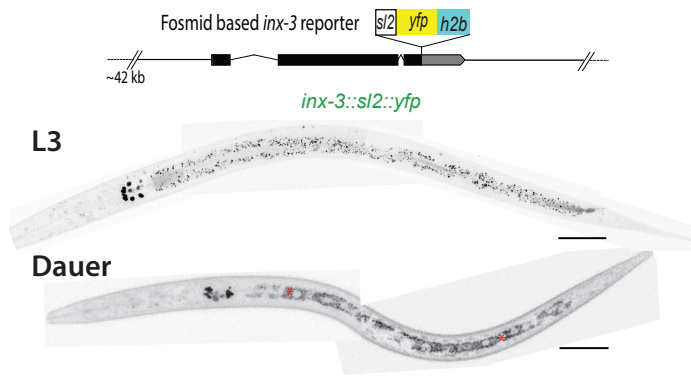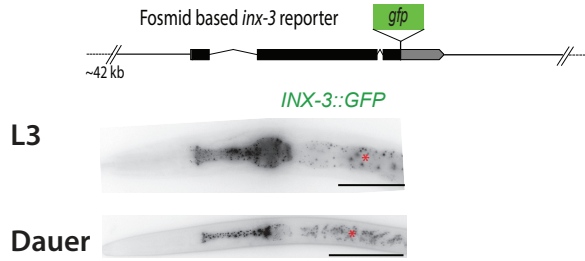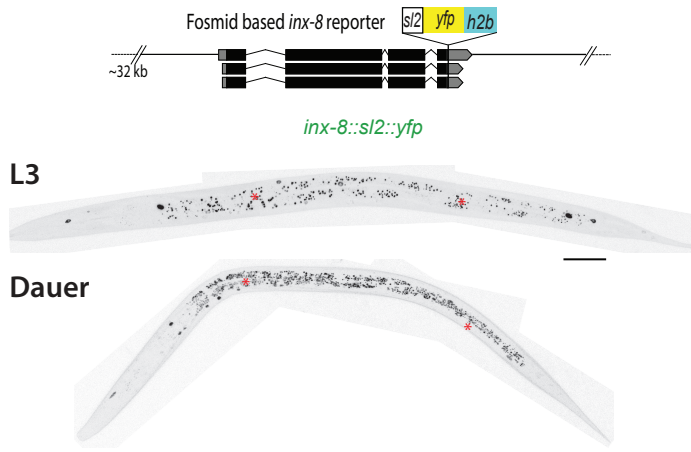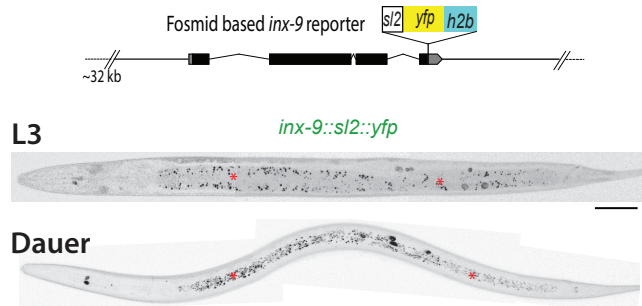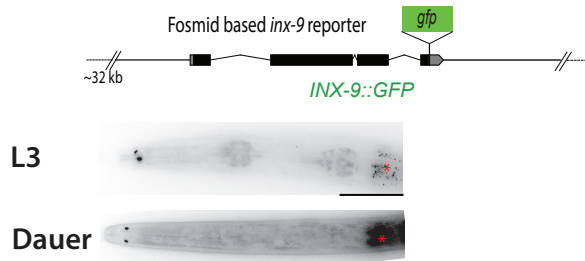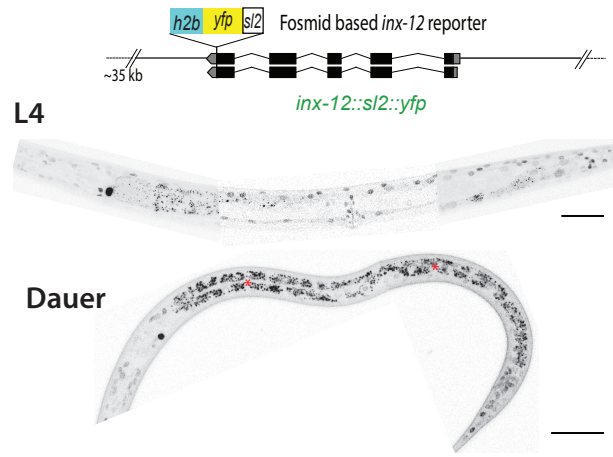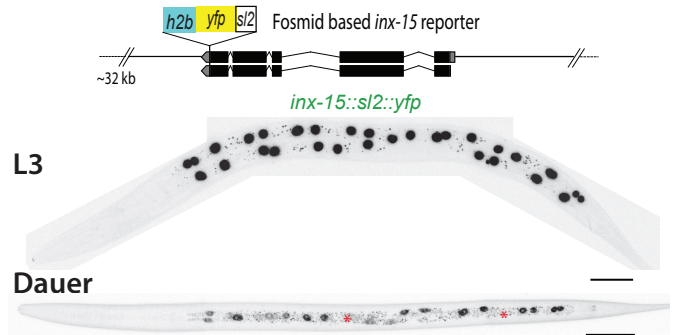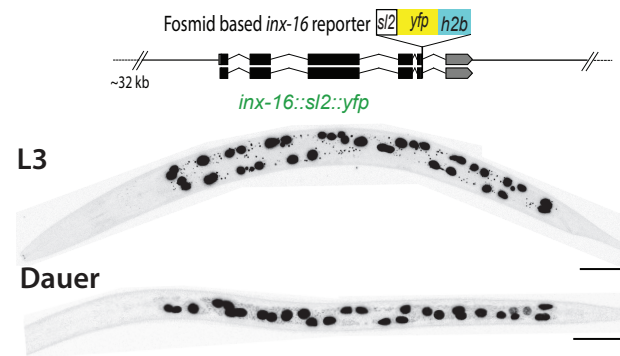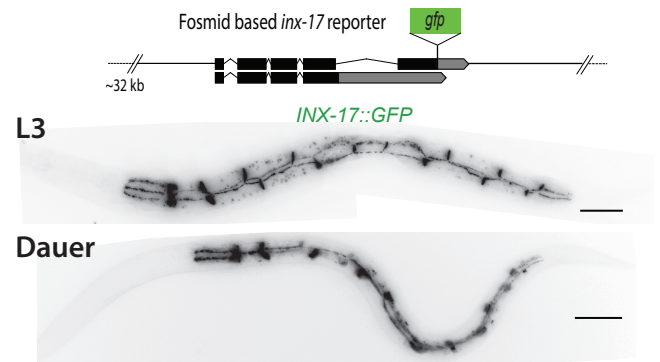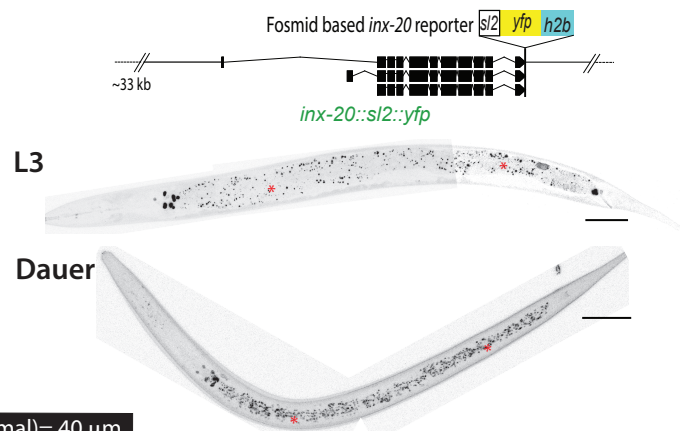

Scale bar (whole animal)= 40  $\mu$ m

Figure S3

Supplement: NIHMS1519292-supplement-3.pdf [file NIHMS1519292-supplement-3.pdf]

# Locomotion Assay

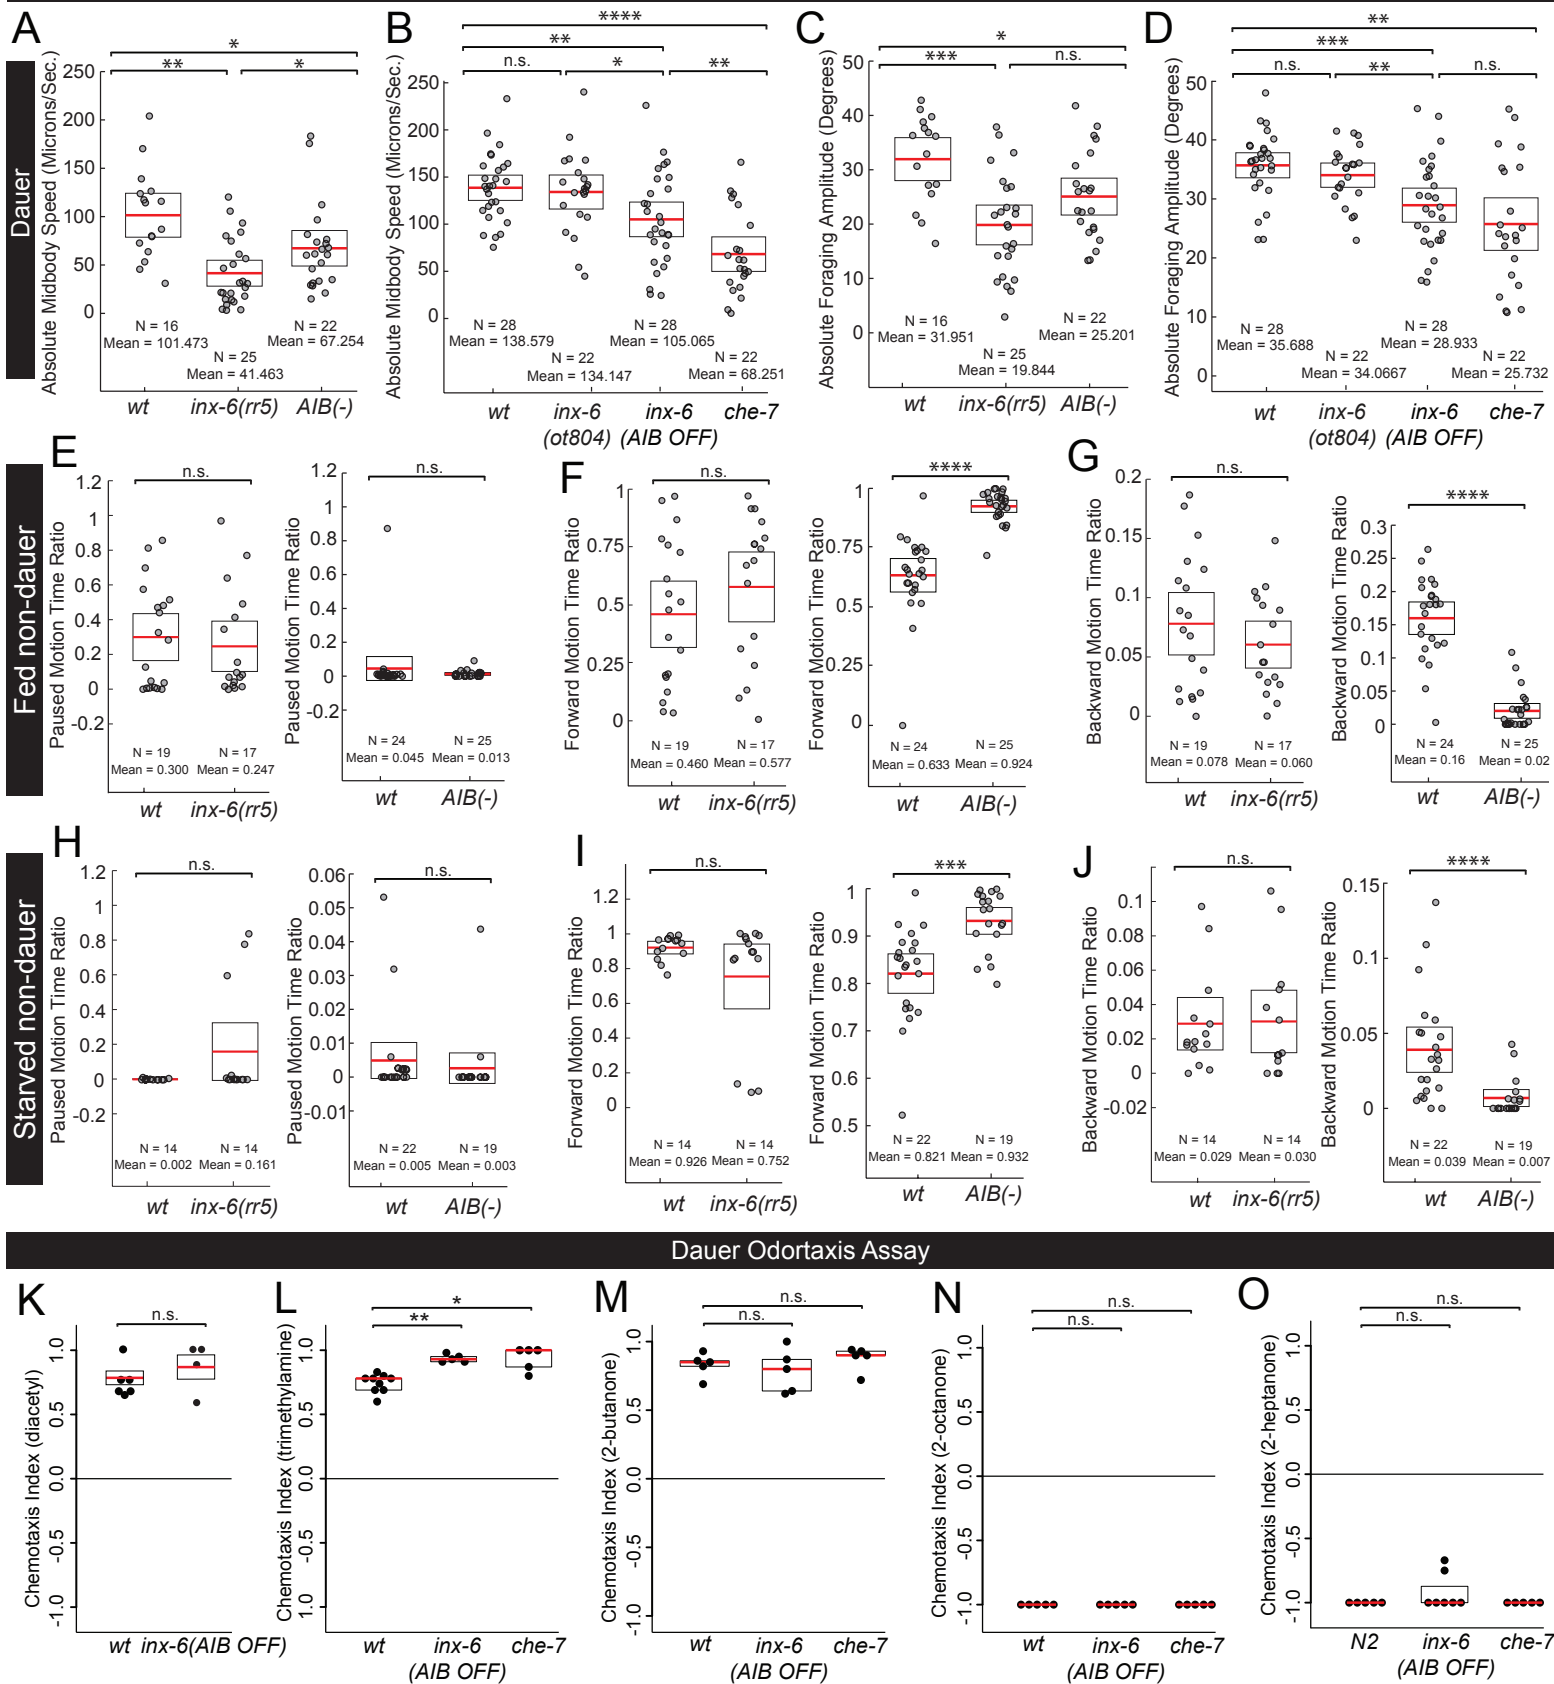

Figure S4

Supplement: NIHMS1519292-supplement-4.pdf [file NIHMS1519292-supplement-4.pdf]
